# Supplementary material for: Ca3La2Te2O12:Mn4+,Nd3+,Yb3+: an efficient thermally-stable UV/visible–far red/NIR broadband spectral converter for c-Si solar cells and plant-growth LEDs
Source: Royal Society of Chemistry journal article supplement (doi:10.1039/c8qm00603b), 2018-12-20
Supplement: c8qm00603b1.pdf [file c8qm00603b1.pdf]

## Supporting Information

### **Ca<sub>3</sub>La<sub>2</sub>Te<sub>2</sub>O<sub>12</sub>:Mn<sup>4+</sup>,Nd<sup>3+</sup>,Yb<sup>3+</sup>: An efficient thermal-stable UV/visible-far red/NIR broadband spectral converter for c-Si solar cells and plant-growth LEDs**

Kai Li,\* and Rik Van Deun

L<sup>3</sup> – Luminescent Lanthanide Lab, Department of Chemistry, Ghent University, Krijgslaan 281-S3, B-9000 Ghent, Belgium

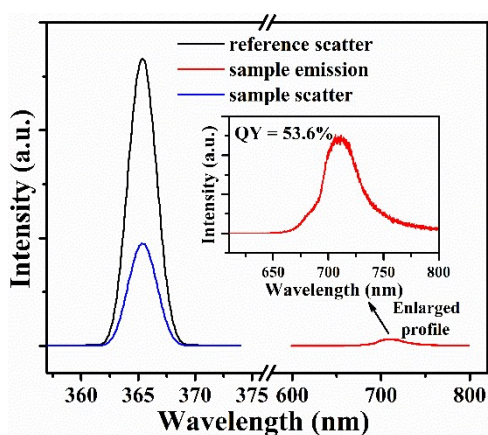

**Fig. S1** Quantitative excitation and emission spectra of CLTO:0.004Mn<sup>4+</sup> and reference sample with the assistance of an integrated sphere.

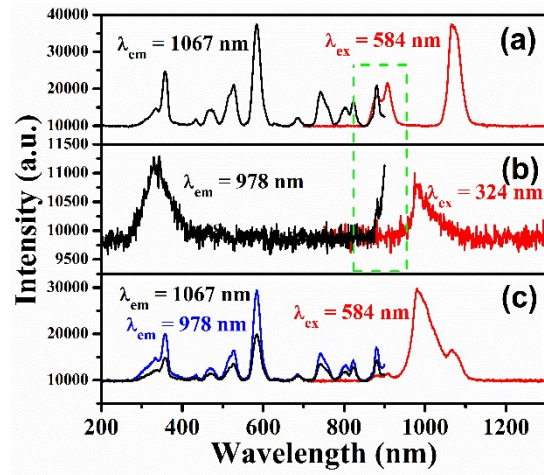

**Fig. S2** PL excitation and emission spectra of CLTO:0.04Nd<sup>3+</sup> (a), CLTO:0.20Yb<sup>3+</sup> (b) and CLTO:0.04Nd<sup>3+</sup>,0.20Yb<sup>3+</sup> (c).

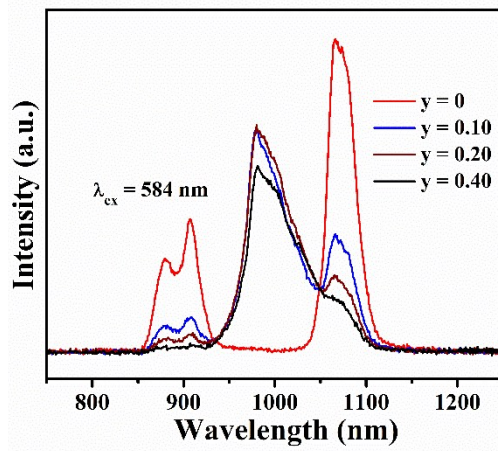

**Fig. S3** Variation of emission spectra for CLTO:0.04Nd<sup>3+</sup>,yYb<sup>3+</sup> samples excited at 584 nm.

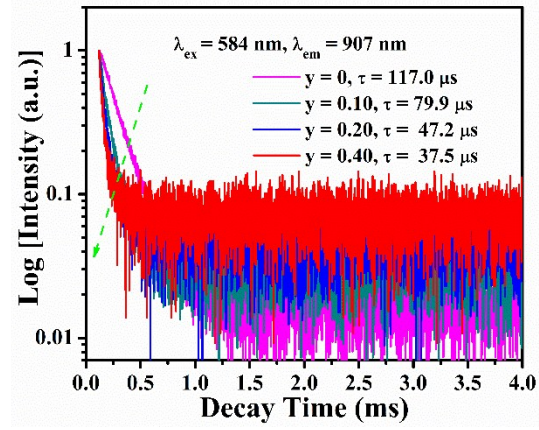

**Fig. S4** Variation of decay curves ( $\lambda_{\text{ex}} = 584 \text{ nm}, \lambda_{\text{em}} = 907 \text{ nm}$ ) for CLTO:0.04Nd<sup>3+</sup>,yYb<sup>3+</sup> samples (y = 0-0.40).

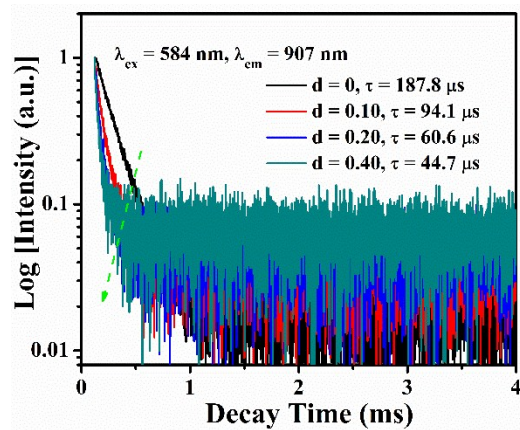

**Fig. S5** Variation of decay curves ( $\lambda_{\text{ex}} = 584 \text{ nm}, \lambda_{\text{em}} = 907 \text{ nm}$ ) for CLTO:0.004Mn<sup>4+</sup>,0.04Nd<sup>3+</sup>,dYb<sup>3+</sup> (d = 0-0.40) samples.
